# Supplementary material
Source: MDPI journal article supplement (https://www.mdpi.com/2073-4344/13/2/264)
Supplement: s1 [file s1 › catalysts-2151553-supplementary.pdf]

# Synthesis of Green Magnetite/Carbonized Coffee Composite from Natural Pyrite for Effective Decontamination of Congo Red Dye: Steric, Synergetic, Oxidation, and Ecotoxicity Studies

Marwa H. Shemy <sup>1,2</sup>, Sarah I. Othman <sup>3,\*</sup>, Haifa E. Alfassam <sup>3</sup>, Maha A. Al-Waele <sup>3</sup>, Haifa A. Alqhtani <sup>3</sup>, Ahmed A. Allam <sup>4</sup> and Mostafa R. Abukhadra <sup>2,5,\*</sup>

<sup>1</sup> Chemistry Department, Faculty of Science, Beni-Suef University, Beni-Suef 65211, Egypt;

<sup>2</sup> Materials Technologies and Their Applications Lab, Geology Department, Faculty of Science, Beni-Suef University, Beni-Suef City, Egypt

<sup>3</sup> Biology Department, College of Science, Princess Nourah bint Abdulrahman University, Riyadh 11564, Saudi Arabia

<sup>4</sup> Zoology Department, Faculty of Science, Beni-Suef University, Beni-Suef, Egypt

<sup>5</sup> Geology Department, Faculty of Science, Beni-Suef University, Beni-Suef 65214, Egypt

\* Correspondence: [sialothman@pnu.edu.sa](mailto:sialothman@pnu.edu.sa) (S.I.O.); [abukhadra89@science.bsu.edu.eg](mailto:abukhadra89@science.bsu.edu.eg) (M.R.A.)

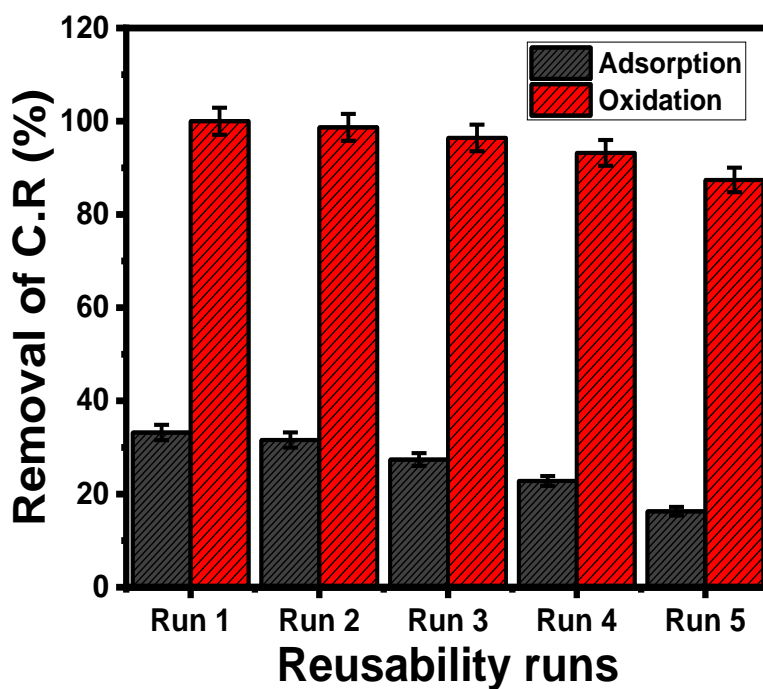

**Figure.S1.** the recyclability properties of MG/CFC ass an adsorbent and catalyst during the photo-Fenton's oxidation of C.R
